# Supplementary material for: Investigations on Vector-Borne and Aerosol Transmission Potential of Kaeng Khoi Virus in Cave-Dwelling Wrinkle-Lipped Free-Tailed Bats (Chaerephon plicatus) in Thailand
Source: MDPI journal article supplement (doi:10.3390/microorganisms9102022), 2021-09-24
Supplement: s1 [file s1]

Table S1. Animal species associated with and around the entrance to Kaeng Khoi cave.

| Species Inside the Cave                                                       |                                                                                                 |
|-------------------------------------------------------------------------------|-------------------------------------------------------------------------------------------------|
| Arthropods                                                                    | Associated Mammal Host                                                                          |
| Flea ( <i>Lagaropsylla macula</i> )                                           | Wrinkle-lipped free-tailed bat ( <i>Chaerephon plicatus</i> ; <i>Tadarida plicata plicata</i> ) |
| Oriental rat flea ( <i>Xenopsylla cheopis</i> )                               | Roof rat ( <i>Rattus rattus</i> )                                                               |
| Tick ( <i>Ixodes kopsteini</i> )                                              | Wrinkle-lipped free-tailed bat ( <i>Chaerephon plicatus</i> ; <i>Tadarida plicata plicata</i> ) |
| Bat flies, family Streblidae ( <i>Brachytarsina macrops</i> )                 | Tomb bat ( <i>Taphozous theobaldi</i> )                                                         |
| Bugs, family Cimicidae ( <i>Cimex insuetus</i> ; <i>Stricticimex parvus</i> ) | <i>C. plicatus</i> , <i>T. theobaldi</i>                                                        |
| Species Outside the Cave                                                      |                                                                                                 |
| Neill's giant dwarf rat ( <i>Leopoldamys neilli</i> )                         |                                                                                                 |
| Limestone rat ( <i>Niviventer hinpoon</i> )                                   |                                                                                                 |
| Roof rat ( <i>Rattus rattus</i> )                                             |                                                                                                 |
| Shikra ( <i>Accipiter badius</i> ) – preys on bats                            |                                                                                                 |
| Oriental hobby ( <i>Falco severus</i> ) – preys on bats                       |                                                                                                 |
| Brown hawk owl ( <i>Ninox scutulata</i> ) – preys on bats                     |                                                                                                 |

Figure S1. Arthropod-proof cages used to house sentinel mice inside Kaeng Khoi cave.

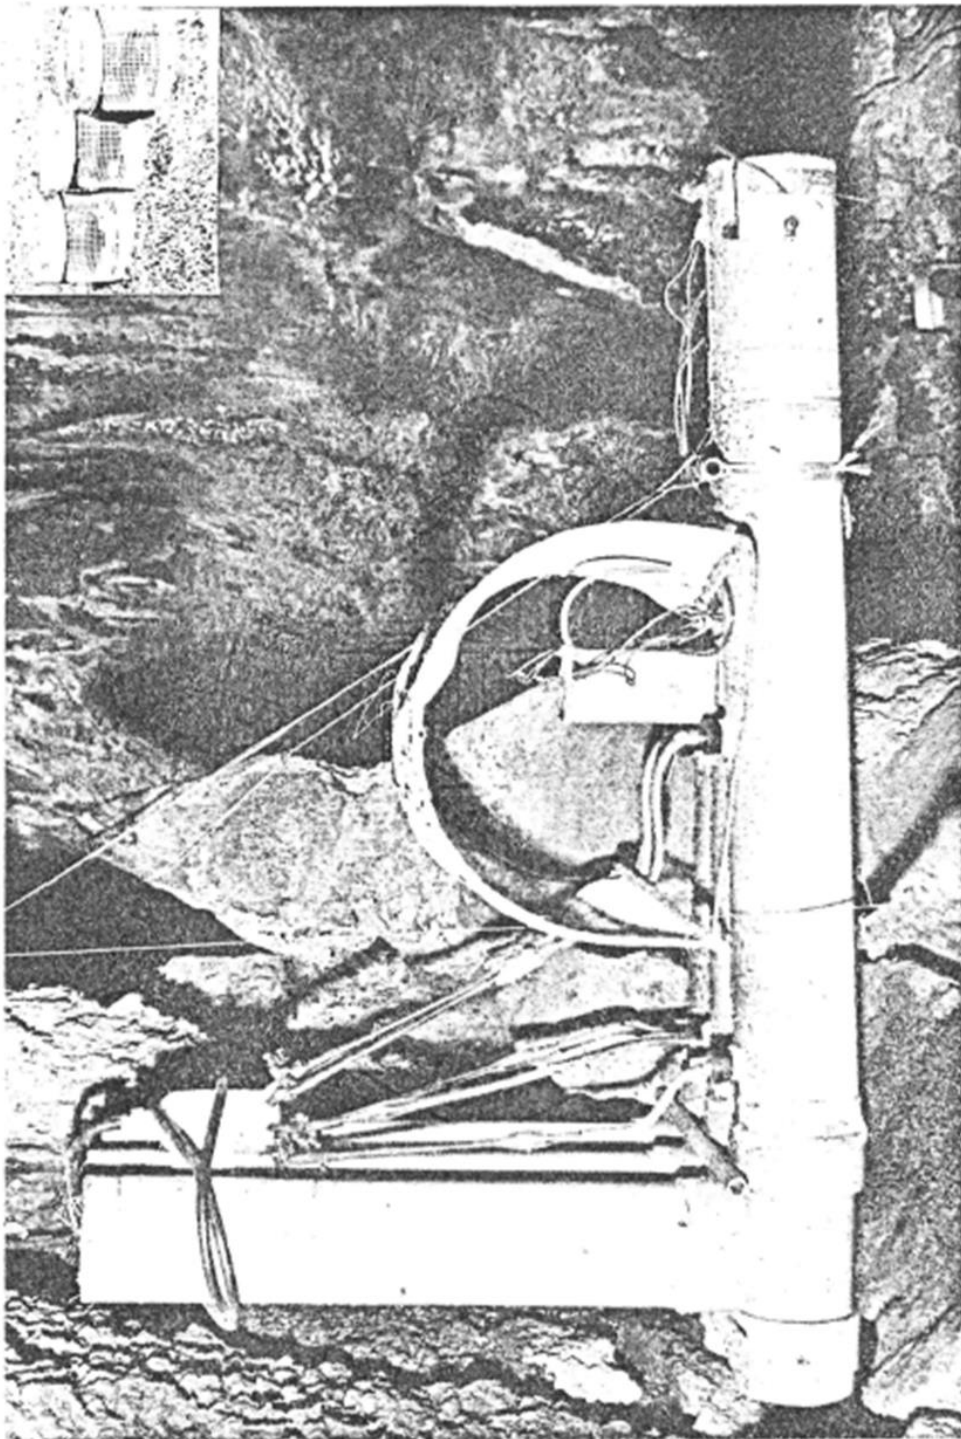

Figure S2. Design of the Arthropod-proof cage.

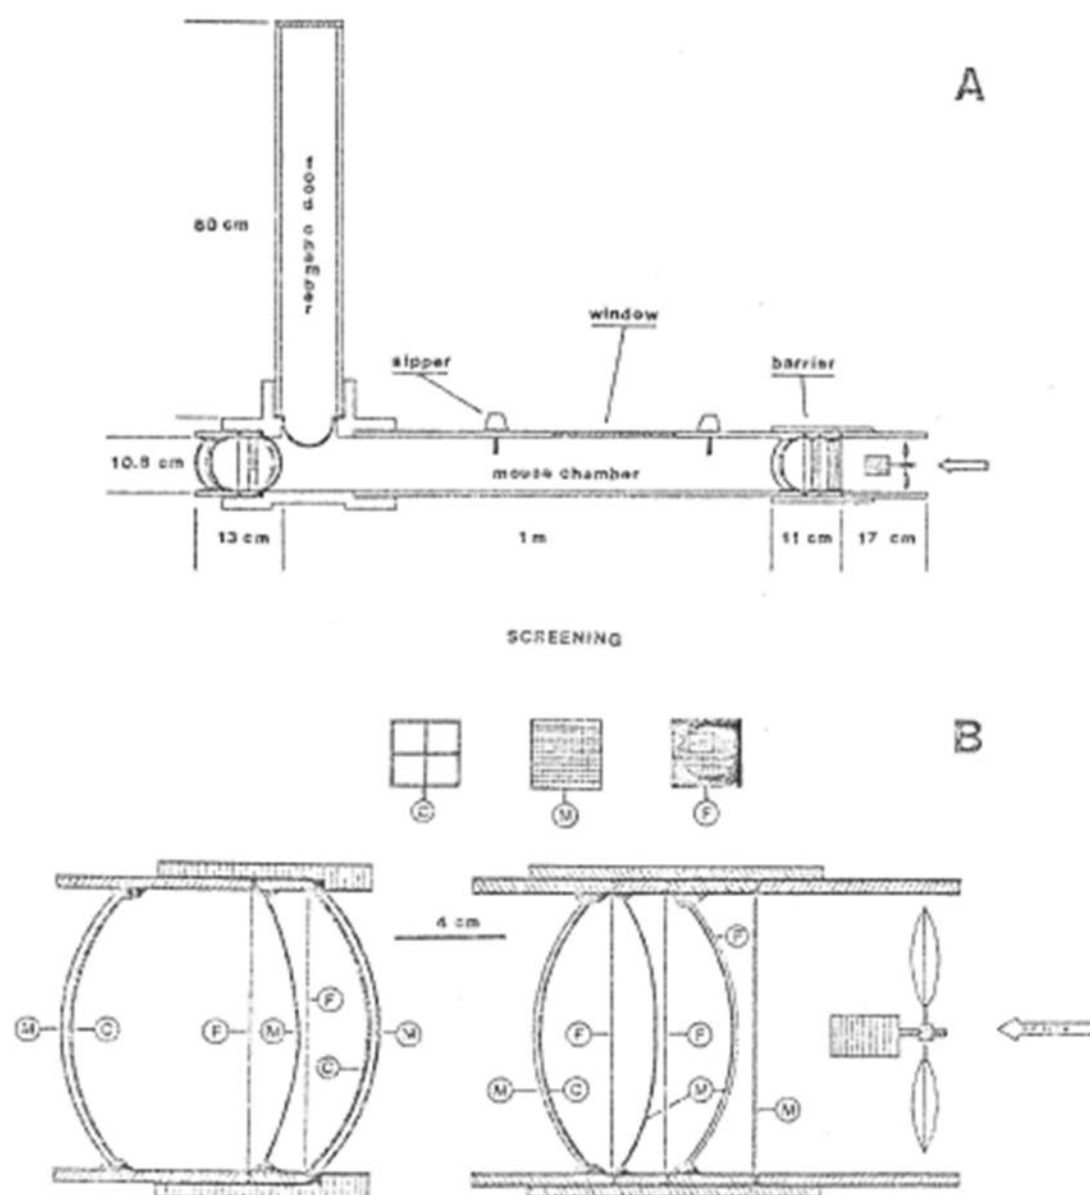

Figure S3. The field director Mr. Lung (Uncle) Noi and his wife, 1969 – 1970.

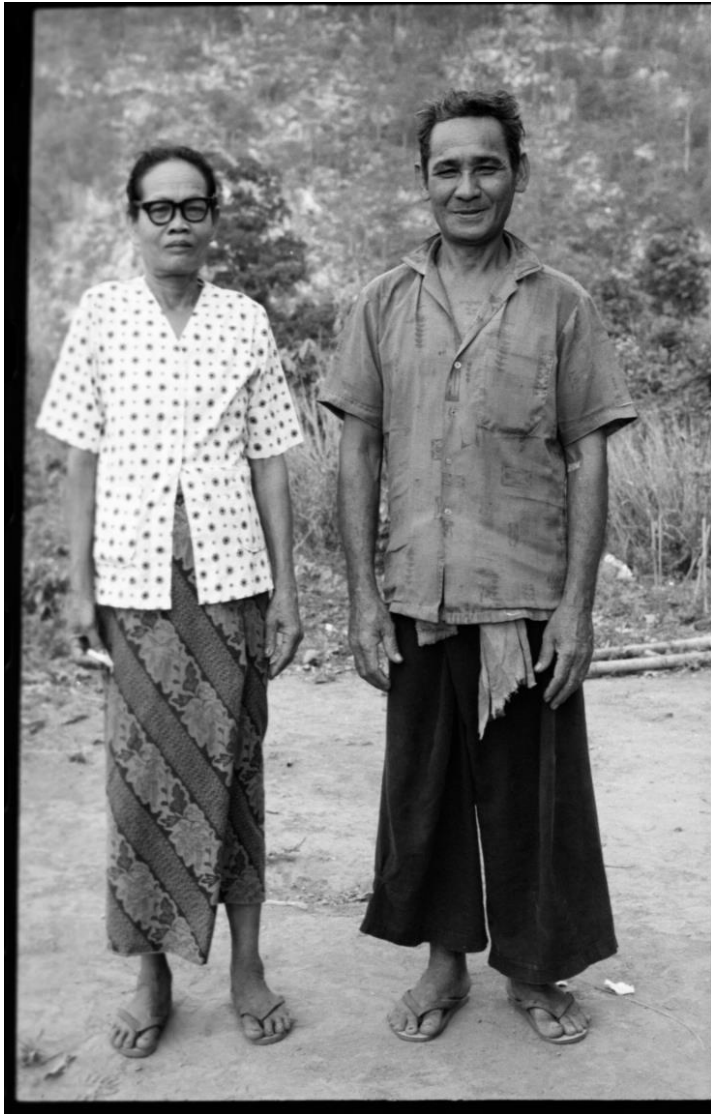

Table S2. Antigens with which immune ascitic fluid to Kaeng Kahoi strain, S-19-B was compared in CF test

TABLE AI. Antigens with which immune ascitic fluid to Kaeng Khoi strain, S-19-B, was compared in CF test<sup>1</sup>

| ARENNAVIRUSES       |                                                    |
|---------------------|----------------------------------------------------|
| <u>Tacaribe</u>     | Junin, LCM, Pichinde, Tacaribe, Tamiami            |
| BUNYAVIRIDAE        |                                                    |
| <u>BUNYAVIRUS</u>   |                                                    |
| <u>Bunyamwera</u>   | Ilesha, Kairi, Sororoca, Tensaw, Wyeomyia          |
| <u>Bwamba</u>       | Bwamba, Pongola                                    |
| <u>C Serogroup</u>  | Apeu, Caraparu, Nepuyo, Oriboca                    |
| <u>Capim</u>        | Acara, BeAn 84381, Bushbush, Capim, Guajara        |
| <u>California</u>   | Melao, Tahyna, Trivittatus                         |
| <u>Guama</u>        | Bertioga, Guama                                    |
| <u>Koongol</u>      | Wongol                                             |
| <u>Patois</u>       | Patois                                             |
| <u>Simbu</u>        | Buttonwillow, Manzanilla, Simbu, Sathuperi, Utinga |
| <u>Tete</u>         | Bahig, Tete                                        |
| <u>Olifantsvlei</u> | Olifantsvlei                                       |
| <u>Unassigned</u>   | Gamboa, Mirim, BeAn 141106                         |

<sup>1</sup>Antigens were provided by the Yale Arbovirus Research Unit (YARU)

TABLE AI (continued)

---

| BUNYAVIRIDAE (continued)                            |                                                                                               |
|-----------------------------------------------------|-----------------------------------------------------------------------------------------------|
| <u>SEROLOGICALLY UNRELATED BUNYAVIRIDAE VIRUSES</u> |                                                                                               |
| <u>Anopheles A</u>                                  | Anopheles A, Lukuni, Tacaiuma                                                                 |
| <u>Anopheles B</u>                                  | Anopheles B, Boracea                                                                          |
| <u>Bakau</u>                                        | Bakau                                                                                         |
| <u>Bhanja</u>                                       | Bhanja                                                                                        |
| <u>Congo</u>                                        | Congo, Hazara                                                                                 |
| <u>Ganjam</u>                                       | Dugbe, Ganjam                                                                                 |
| <u>Kaisodi</u>                                      | Kaisodi, Lanjan, Silverwater                                                                  |
| <u>Lone Star</u>                                    | Lone Star                                                                                     |
| <u>Mapputta</u>                                     | Mapputta, Trubaman                                                                            |
| <u>Pacui</u>                                        | Pacui                                                                                         |
| <u>Phlebotomus Fever</u>                            | Arumowot, Anhanga, BeAn 100049, Bujaru, Candiru, Chagres,<br>Icoaraci, Itaporanga, Punta Toro |
| <u>Tataguine</u>                                    | Tataguine                                                                                     |
| <u>Thogoto</u>                                      | Thogoto                                                                                       |
| <u>Turlock</u>                                      | Turlock, Umbre, Yaba 1                                                                        |

TABLE AI (continued)

---

| BUNYAVIRIDAE (continued)   |                                                                                         |
|----------------------------|-----------------------------------------------------------------------------------------|
| <u>Uukuniemi</u>           | EgAn 1825-61, Grand Arbaud, Uukuniemi                                                   |
| <u>Witwatersrand</u>       | Witwatersrand                                                                           |
| HERPESVIRUS                |                                                                                         |
|                            | Herpes simplex                                                                          |
| ORBIVIRUSES                |                                                                                         |
| <u>Eubenangee</u>          | Acado, Eubenangee, Pata, Epizootic haemorrhagic disease of deer, N.J. strain IbAr 22619 |
| <u>Corriparta</u>          | Corriparta                                                                              |
| <u>Changuinola</u>         | Changuinola, Irituia                                                                    |
| <u>Kemerovo</u>            | Chenuda, Kemerovo, Tribec, Wad Medani, Mono Lake                                        |
| <u>Palyan</u>              | Palyan                                                                                  |
| <u>Lebombo</u>             | Lebombo                                                                                 |
| <u>Colorado Tick Fever</u> | Colorado Tick Fever                                                                     |
| <u>Blue Tongue</u>         | Blue Tongue                                                                             |
| PARAMYXOVIRUSES            |                                                                                         |
|                            | Newcastle disease                                                                       |
|                            | Nariva                                                                                  |

TABLE AI (continued)

---

PICORNAVIRIDAE

Encephalomyocarditis (EMC-Kissling)  
 Mouse (GD-7) Polio

## POXVIRUSES

Cotia  
 Ectromelia

## REOVIRUS

Reovirus Type 3

## RHABDOVIRUSES

Vesicular Stomatitis  
 Piry, VS-Indiana, VA-New Jersey

Rabies  
 Lagos Bat, IbAn 27377, Rabies

Kern Canyon  
 Kern Canyon

Mt. Elgon Bat  
 Mt. Elgon Bat

Hart Park  
 Hart Park

## TOGAVIRIDAE

Alphavirus  
 EEE, WEE, Sindbus, Chikungunya

Flavivirus  
 SLE, Powassan, Montano Myotis Leukoencephalitis (MML),  
 Yellow Fever, Louping Ill, West Nile, Zika, Kadam, Ntaya

## UNCLASSIFIED VIRUSES

MINOR SEROLOGICAL GROUPS

Nyando  
 Eretmapodites 147, Nyando



TABLE AI (continued)

## UNCLASSIFIED VIRUSES (continued)

Mossuril

Kamese, Mossuril

Hughes

Farallon, Hughes, Soldada Rock

Quaranfil

Johnston Atoll, Quaranfil, Napal Tick

Qalyub

Bandia, Qalyub

Timbo

Chaco, Timbo

SEROLOGICALLY UNGROUPED VIRUSES

|               |             |
|---------------|-------------|
| Aruac         | Germiston   |
| Aus MK 7532   | Gossas      |
| Aus CH 9824   |             |
| Aus CH 9935   | I 6235      |
| Aus MRM 10434 | I 66416     |
| Aus MK 6357   | I 61-2629   |
| Aus MK 7937   | I 66415     |
|               | I 58        |
| BeAn 67949    | I 81        |
| Be Ar 106435  | I 66413     |
| Boteke        | I 66413     |
| Botembe       | Ib An 10065 |
|               | Ib An 28946 |
| Burg el Arab  | Ib An 17854 |
|               | Ib An 17143 |
| Ch 9935       | Ib Ar 23380 |
| Conn An 114   | Ib H 11306  |
|               | Ieri        |
| DGK           |             |
|               | J 19        |
| Eg An 1398-61 | J 134       |
| Eg Art 904    | Jurona      |
| Eg Art 1237   |             |
| Eg Art 1113   | Klamath     |
|               | Kowanyama   |

TABLE AI (continued)

## UNCLASSIFIED VIRUSES (continued)

SEROLOGICALLY UNGROUPED VIRUSES (continued)

M 22 68a  
Marco  
Matariya  
Minatitlan (Mex 67 U5)  
Minnal  
MM 314  
MP 359  
MRM 40434  
MRM 4059

Naples  
Navarro (Calif. 874)  
Nyamanini

Okola  
Oyo

Pak Argas 461

Q 3255  
Sa An 3518  
Sawgrass  
Sicilian  
Sli 763  
Sud Ar 1169-64

Tembe  
Thimiri  
Triniti

Upolu

YM 31

Table S3. Grouping ascitic fluids compared with Kaeng Khoi strain, S-19-B, antigen in CF test

TABLE AII. Grouping ascitic fluids compared with Kaeng Khoi strain, S-19-B, antigen in CF test<sup>1</sup>

---

POLYVALENT ASCITIC FLUIDS

Group A  
 Group B  
 Group C  
 Group Bunyamwera  
 Group Simbu  
 Group Capim  
 Polyvalent Anopheles A etc. G211-601-567  
 Group Bwamba  
 Poly. Herpes, Rabies, LCM, Vaccinia, NDV  
 Group California  
 Group Guama  
 Polyvalent Quarenfil-Kaisodi-Qalyub  
 Group Tacaribe  
 Group VSV  
 Group Patois  
 Group Phlebotomus  
 Group Kemerovo  
 Polyvalent Palyam  
 Group Tete  
 Group Hart Park  
 Group Nyamanini  
 Group Tembe  
 Group Kwatta  
 Group Trinita  
 Group Jurona  
 Blue Tongue

---

<sup>1</sup>Grouping ascitic fluids were provided by the Yale Arbovirus Research Unit (YARU)
